# Supplementary material for: Measuring Social Determinants of Health in the All of Us Research Program: Technical Document
Source: medRxiv preprint, doi:10.1101/2023.06.01.23290404, version 1 (2023-06-05)
Supplement: Appendix 1 [file 290404_file03.docx]

## Appendix Table 1: SDOH Survey Development Process

| Process | Considerations |
| --- | --- |
| Phase I: Select conceptual frameworks and define SDOH for the *All of Us* survey | - Prioritize frameworks that guide research on connections between social factors and health - Prioritize frameworks and definitions that improve communication on social concepts in large and diverse participant audiences |
| Phase II: Define inclusion and exclusion criteria, and priorities for selecting and using constructs and measures | Inclusion criteria.  Concepts should:   - measure *perceptions* that can only be collected through participant responses; - connect to core drivers of health inequities (e.g., perceived discrimination); - have documentation on measure validation and psychometric performance; - have strong use cases (structural, social and biologic) to facilitate research on mechanisms between SDOHs and health.   Exclusion criteria.  Concepts should not be:   - new concepts and measures without psychometric validation (with rare exception); - concepts that can be collected without burdening participants (e.g., via geocoding) - concepts that may be more reliability captured through other modalities besides participant surveys (e.g., wealth) - concepts that may require sufficient items or measures to merit a dedicated survey (e.g., acculturation, wealth)   Priorities for selecting and incorporating measures.   - constructs and measures should be validated with high reliability in diverse cohorts and in multiple languages. - measures should be included in the form in which they were validated, and item response sets should not be altered as practically possible. |
| Phase III: Review the science to select standardized measures with use cases in precision medicine | - Prioritize measures that operationalize concepts in the World Health Organization Conceptual Framework for Action on the Social Determinants of Health,1 and the five domain areas of the Healthy People framework for SDOH (*social and community*; *economic stability*; *education*; *neighborhood and built environment*; *health and health care*.)12 - Prioritize measures with data from epidemiologic cohort studies and other designs that elucidate mechanisms among SDOHs and connections to health |
| Phase IV: Examine surveys, measures and items in other large biobanks, cohort studies, epidemiologic surveys and toolkits to find opportunities to align measures | - UK Biobank - Million Veteran Program - Behavioral Risk Factor Surveillance Survey - National Health and Nutrition Examination Survey - [NIH PhenX Toolkit SDOH Collections](https://www.phenxtoolkit.org/collections/sdoh) |
| Phase V: Coordinate internally with other *All of Us* task forces to avoid duplication | - Mental health - Environmental health - “The Basics” assessment of income, educational attainment, race, ethnicity, age, sexual orientation, gender identity, health care access, insurance status |
| Phase VI: Consult with scientific subject matter experts and participant partners in *All of Us* | - Developers of key measures of interest - NIH Institutes: NHLBI, NIDDK, NICHD, NIMHD, OBSSR, ORWH - *All of Us* Participant Ambassadors |
